# Supplementary material for: Pavement Quality Index Rating Strategy Using Fracture Energy Analysis for Implementing Smart Road Infrastructure
Source: MDPI journal article supplement (doi:10.3390/s21124231), 2021-06-20
Supplement: s1 [file s1]

## APPENDIX I

### GRIFFITH ENERGY RELEASE FOR PAVEMENT FAILURE CONSIDERING TEMPERATURE AS ENVIRONMENTAL INPUT PARAMETERS

| Time | Temperature<br>1 | Temperature<br>2 | Temperature<br>3 | GT (T1)  | GT(T2)   | GT(T3)   | E (T1)   | E(T2)    | E(T3)    |
|------|------------------|------------------|------------------|----------|----------|----------|----------|----------|----------|
| 10   | 23,87            | 24,06            | 23,44            | 1,751691 | 1,710227 | 1,847944 | 398204,4 | 395738,2 | 403842,5 |
| 20   | 24,62            | 24,75            | 24,25            | 1,59182  | 1,565145 | 1,669416 | 388558,1 | 386910   | 393287,4 |
| 30   | 25,06            | 25               | 24,69            | 1,502769 | 1,514706 | 1,577419 | 383008,1 | 383760,3 | 387669,8 |
| 40   | 24,94            | 24,87            | 24,69            | 1,526708 | 1,540793 | 1,577419 | 384513,9 | 385394,9 | 387669,8 |
| 50   | 25,12            | 25,06            | 24,87            | 1,490896 | 1,502769 | 1,540793 | 382257,5 | 383008,1 | 385394,9 |
| 60   | 25,37            | 25,19            | 25,19            | 1,442125 | 1,477127 | 1,477127 | 379145,6 | 381383,6 | 381383,6 |
| 70   | 25,75            | 25,62            | 25,5             | 1,370139 | 1,394475 | 1,417207 | 374463,9 | 376059   | 377537,4 |
| 80   | 26,06            | 25,94            | 25,81            | 1,31332  | 1,335112 | 1,359008 | 370687,6 | 372144,8 | 373730   |
| 90   | 26,12            | 25,94            | 25,94            | 1,302519 | 1,335112 | 1,335112 | 369961   | 372144,8 | 372144,8 |
| 100  | 26,19            | 26               | 26               | 1,289999 | 1,324184 | 1,324184 | 369115,3 | 371415,5 | 371415,5 |
| 110  | 26,37            | 26,25            | 26,19            | 1,2582   | 1,279336 | 1,289999 | 366949,2 | 368391,8 | 369115,3 |
| 120  | 26,69            | 26,56            | 26,5             | 1,203068 | 1,22525  | 1,235587 | 363129,9 | 364676,7 | 365392,8 |

|     |       |       |       |          |          |          |          |          |          |
|-----|-------|-------|-------|----------|----------|----------|----------|----------|----------|
| 130 | 26,94 | 26,81 | 26,75 | 1,161233 | 1,182852 | 1,192929 | 360173,7 | 361707,9 | 362418,2 |
| 140 | 27,12 | 26,75 | 26,87 | 1,131777 | 1,192929 | 1,172838 | 358060,2 | 362418,2 | 360999   |
| 150 | 27,12 | 26,75 | 26,87 | 1,131777 | 1,192929 | 1,172838 | 358060,2 | 362418,2 | 360999   |
| 160 | 27,12 | 26,69 | 26,94 | 1,131777 | 1,203068 | 1,161233 | 358060,2 | 363129,9 | 360173,7 |
| 170 | 27,06 | 26,62 | 26,87 | 1,141534 | 1,214976 | 1,172838 | 358763,3 | 363962   | 360999   |
| 180 | 27,25 | 26,94 | 27,06 | 1,110848 | 1,161233 | 1,141534 | 356541,4 | 360173,7 | 358763,3 |
| 190 | 27,5  | 27,06 | 27,25 | 1,071404 | 1,141534 | 1,110848 | 353638,9 | 358763,3 | 356541,4 |
| 201 | 27,75 | 27,12 | 27,44 | 1,03301  | 1,131777 | 1,080775 | 350760   | 358060,2 | 354333,3 |
| 211 | 28,19 | 27,56 | 27,81 | 0,967949 | 1,062094 | 1,02395  | 345749,8 | 352945,8 | 350072,5 |
| 221 | 28,62 | 27,75 | 28,19 | 0,907405 | 1,03301  | 0,967949 | 340922,8 | 350760   | 345749,8 |
| 231 | 28,56 | 27,56 | 28,12 | 0,915675 | 1,062094 | 0,978088 | 341592,2 | 352945,8 | 346542,1 |
| 241 | 28,81 | 27,87 | 28,37 | 0,881591 | 1,01495  | 0,942244 | 338811,4 | 349386,4 | 343720,9 |
| 251 | 28,44 | 27,56 | 28,19 | 0,932388 | 1,062094 | 0,967949 | 342935,1 | 352945,8 | 345749,8 |
| 261 | 27,62 | 26,94 | 27,62 | 1,052845 | 1,161233 | 1,052845 | 352254,1 | 360173,7 | 352254,1 |
| 271 | 27,12 | 26,69 | 27,12 | 1,131777 | 1,203068 | 1,131777 | 358060,2 | 363129,9 | 358060,2 |
| 281 | 26,81 | 26,31 | 26,81 | 1,182852 | 1,268736 | 1,182852 | 361707,9 | 367669,8 | 361707,9 |
| 291 | 26,37 | 25,94 | 26,37 | 1,2582   | 1,335112 | 1,2582   | 366949,2 | 372144,8 | 366949,2 |
| 301 | 26,25 | 25,94 | 26,19 | 1,279336 | 1,335112 | 1,289999 | 368391,8 | 372144,8 | 369115,3 |

|     |       |       |       |          |          |          |          |          |          |
|-----|-------|-------|-------|----------|----------|----------|----------|----------|----------|
| 311 | 26,31 | 26,06 | 26,25 | 1,268736 | 1,31332  | 1,279336 | 367669,8 | 370687,6 | 368391,8 |
| 321 | 26,75 | 26,25 | 26,62 | 1,192929 | 1,279336 | 1,214976 | 362418,2 | 368391,8 | 363962   |
| 331 | 27,25 | 26,31 | 27,19 | 1,110848 | 1,268736 | 1,120472 | 356541,4 | 367669,8 | 357241,6 |
| 341 | 27,62 | 26,5  | 27,5  | 1,052845 | 1,235587 | 1,071404 | 352254,1 | 365392,8 | 353638,9 |
| 351 | 27,75 | 26,56 | 27,62 | 1,03301  | 1,22525  | 1,052845 | 350760   | 364676,7 | 352254,1 |
| 361 | 27,87 | 26,69 | 27,81 | 1,01495  | 1,203068 | 1,02395  | 349386,4 | 363129,9 | 350072,5 |
| 372 | 27,87 | 26,69 | 27,81 | 1,01495  | 1,203068 | 1,02395  | 349386,4 | 363129,9 | 350072,5 |
| 382 | 27,56 | 26,37 | 27,56 | 1,062094 | 1,2582   | 1,062094 | 352945,8 | 366949,2 | 352945,8 |
| 392 | 27,44 | 26,06 | 27,37 | 1,080775 | 1,31332  | 1,091783 | 354333,3 | 370687,6 | 355145,2 |
| 402 | 27,19 | 25,81 | 27,12 | 1,120472 | 1,359008 | 1,131777 | 357241,6 | 373730   | 358060,2 |
| 412 | 26,5  | 25,56 | 26,62 | 1,235587 | 1,405809 | 1,214976 | 365392,8 | 376797,5 | 363962   |
| 422 | 25,75 | 25    | 25,94 | 1,370139 | 1,514706 | 1,335112 | 374463,9 | 383760,3 | 372144,8 |
| 432 | 25,19 | 24,5  | 25,37 | 1,477127 | 1,616715 | 1,442125 | 381383,6 | 390085,7 | 379145,6 |
| 442 | 24,81 | 24,25 | 25    | 1,552937 | 1,669416 | 1,514706 | 386151,7 | 393287,4 | 383760,3 |
| 452 | 24,56 | 23,94 | 24,69 | 1,604235 | 1,736339 | 1,577419 | 389321,2 | 397294   | 387669,8 |
| 462 | 24,37 | 23,75 | 24,5  | 1,643978 | 1,778216 | 1,616715 | 391747,3 | 399769,8 | 390085,7 |
| 472 | 24,12 | 23,44 | 24,25 | 1,697269 | 1,847944 | 1,669416 | 394962,6 | 403842,5 | 393287,4 |
| 482 | 23,81 | 23,12 | 24    | 1,764921 | 1,921736 | 1,72325  | 398986,3 | 408090   | 396515,3 |

|     |       |       |       |          |          |          |          |          |          |
|-----|-------|-------|-------|----------|----------|----------|----------|----------|----------|
| 492 | 23,44 | 22,75 | 23,69 | 1,847944 | 2,009345 | 1,791576 | 403842,5 | 413057   | 400554,9 |
| 502 | 23,12 | 22,37 | 23,31 | 1,921736 | 2,101853 | 1,8777   | 408090   | 418221,2 | 405562,7 |
| 512 | 22,87 | 22,06 | 23,06 | 1,980664 | 2,179199 | 1,935777 | 411439,5 | 422481,8 | 408891,4 |
| 522 | 22,62 | 21,94 | 22,81 | 2,040706 | 2,209588 | 1,994973 | 414816,5 | 424142,7 | 412247,5 |
| 532 | 22,31 | 21,5  | 22,56 | 2,116692 | 2,323129 | 2,055281 | 419042,4 | 430288,8 | 415631,1 |
| 542 | 21,94 | 21,19 | 22,25 | 2,209588 | 2,40509  | 2,131595 | 424142,7 | 434672,3 | 419865,3 |
| 553 | 21,81 | 21,06 | 22,06 | 2,24279  | 2,439936 | 2,179199 | 425949,4 | 436523,9 | 422481,8 |
| 563 | 21,75 | 21    | 22    | 2,258211 | 2,456113 | 2,194362 | 426785,8 | 437381,1 | 423311,4 |
| 573 | 21,62 | 20,87 | 21,87 | 2,291836 | 2,491364 | 2,22743  | 428603,8 | 439244,2 | 425114,6 |
| 583 | 21,25 | 20,37 | 21,56 | 2,389102 | 2,629474 | 2,307452 | 433820,4 | 446484,1 | 429445,4 |
| 593 | 21    | 20,12 | 21,31 | 2,456113 | 2,699997 | 2,373173 | 437381,1 | 450148,7 | 432970,2 |
| 603 | 20,81 | 20    | 21,12 | 2,507726 | 2,734188 | 2,423819 | 440106,7 | 451918,4 | 435668,3 |
| 613 | 20,75 | 19,94 | 21,06 | 2,524147 | 2,751364 | 2,439936 | 440971   | 452805,8 | 436523,9 |
| 623 | 20,69 | 19,81 | 20,94 | 2,540625 | 2,788764 | 2,472349 | 441836,9 | 454734,6 | 438240   |
| 633 | 20,62 | 19,75 | 20,87 | 2,559922 | 2,806109 | 2,491364 | 442849,3 | 455627,6 | 439244,2 |
| 643 | 20,37 | 19,5  | 20,69 | 2,629474 | 2,878945 | 2,540625 | 446484,1 | 459367,2 | 441836,9 |
| 653 | 20,06 | 19,31 | 20,44 | 2,717065 | 2,934895 | 2,6099   | 451032,7 | 462229,9 | 445463,4 |
| 663 | 19,81 | 19,12 | 20,31 | 2,788764 | 2,991345 | 2,646311 | 454734,6 | 465110,3 | 447360,9 |

|     |       |       |       |          |          |          |          |          |          |
|-----|-------|-------|-------|----------|----------|----------|----------|----------|----------|
| 673 | 19,87 | 19,06 | 20,25 | 2,771471 | 3,009274 | 2,663205 | 453843,4 | 466023,7 | 448239,4 |
| 683 | 20    | 19,06 | 20,12 | 2,734188 | 3,009274 | 2,699997 | 451918,4 | 466023,7 | 450148,7 |
| 693 | 20    | 19    | 19,94 | 2,734188 | 3,02725  | 2,751364 | 451918,4 | 466938,8 | 452805,8 |
| 703 | 19,62 | 18,69 | 19,75 | 2,843871 | 3,120882 | 2,806109 | 457568,4 | 471695,8 | 455627,6 |
| 713 | 19,19 | 18,31 | 19,5  | 2,97049  | 3,237309 | 2,878945 | 464047   | 477593,1 | 459367,2 |
| 724 | 18,81 | 18,12 | 19,25 | 3,08449  | 3,296171 | 2,952668 | 469848,7 | 480569,3 | 463137,6 |
| 734 | 18,75 | 18    | 19,12 | 3,102663 | 3,333561 | 2,991345 | 470771,3 | 482458,5 | 465110,3 |
| 744 | 18,62 | 17,87 | 19    | 3,142195 | 3,374247 | 3,02725  | 472776,6 | 484513,6 | 466938,8 |
| 754 | 18,56 | 17,81 | 18,94 | 3,160512 | 3,393087 | 3,045275 | 473705   | 485465,1 | 467855,8 |
| 764 | 18,56 | 17,81 | 18,87 | 3,160512 | 3,393087 | 3,066363 | 473705   | 485465,1 | 468927,8 |
| 774 | 18,5  | 17,75 | 18,87 | 3,178874 | 3,411965 | 3,066363 | 474635,3 | 486418,4 | 468927,8 |
| 784 | 18,37 | 17,56 | 18,75 | 3,218809 | 3,471995 | 3,102663 | 476657   | 489449,6 | 470771,3 |
| 794 | 18,19 | 17,37 | 18,56 | 3,274436 | 3,532388 | 3,160512 | 479470,6 | 492499,7 | 473705   |
| 804 | 18    | 17,25 | 18,37 | 3,333561 | 3,57071  | 3,218809 | 482458,5 | 494435,9 | 476657   |
| 814 | 17,81 | 17,06 | 18,25 | 3,393087 | 3,631658 | 3,255852 | 485465,1 | 497517,1 | 478530,9 |
| 824 | 17,62 | 16,94 | 18,12 | 3,452998 | 3,670315 | 3,296171 | 488490,4 | 499473   | 480569,3 |
| 834 | 17,5  | 16,81 | 18    | 3,491028 | 3,71233  | 3,333561 | 490410,8 | 501600,5 | 482458,5 |
| 844 | 17,37 | 16,69 | 17,87 | 3,532388 | 3,751234 | 3,374247 | 492499,7 | 503572,5 | 484513,6 |

|      |       |       |       |          |          |          |          |          |          |
|------|-------|-------|-------|----------|----------|----------|----------|----------|----------|
| 854  | 17,19 | 16,44 | 17,69 | 3,589922 | 3,832635 | 3,430882 | 495406,8 | 507705,7 | 487373,6 |
| 864  | 16,87 | 16,19 | 17,37 | 3,692921 | 3,914473 | 3,532388 | 500617,5 | 511872,7 | 492499,7 |
| 874  | 16,56 | 15,88 | 17,12 | 3,793505 | 4,016489 | 3,612376 | 505717,5 | 517087,5 | 496542   |
| 884  | 16,31 | 15,56 | 16,87 | 3,87514  | 4,122326 | 3,692921 | 509868,3 | 522526,1 | 500617,5 |
| 894  | 16,12 | 15,31 | 16,62 | 3,93746  | 4,205319 | 3,77398  | 513045,6 | 526814,8 | 504726,4 |
| 905  | 15,94 | 15,19 | 16,5  | 3,996701 | 4,245235 | 3,813057 | 516074   | 528885,9 | 506710,6 |
| 915  | 15,94 | 15,19 | 16,37 | 3,996701 | 4,245235 | 3,855508 | 516074   | 528885,9 | 508869   |
| 925  | 16,06 | 15,19 | 16,25 | 3,957186 | 4,245235 | 3,894795 | 514053,1 | 528885,9 | 510869,5 |
| 935  | 16,25 | 15,25 | 16,19 | 3,894795 | 4,225271 | 3,914473 | 510869,5 | 527849,4 | 511872,7 |
| 945  | 16,37 | 15,25 | 16,06 | 3,855508 | 4,225271 | 3,957186 | 508869   | 527849,4 | 514053,1 |
| 955  | 16,37 | 15,19 | 15,94 | 3,855508 | 4,245235 | 3,996701 | 508869   | 528885,9 | 516074   |
| 965  | 16,31 | 15    | 15,81 | 3,87514  | 4,308522 | 4,039598 | 509868,3 | 532181,8 | 518272,3 |
| 975  | 16,19 | 14,94 | 15,63 | 3,914473 | 4,328527 | 4,099133 | 511872,7 | 533226,8 | 521331,5 |
| 985  | 16    | 14,75 | 15,44 | 3,976934 | 4,391922 | 4,162133 | 515062,6 | 536549,8 | 524580,3 |
| 995  | 15,88 | 14,63 | 15,31 | 4,016489 | 4,43199  | 4,205319 | 517087,5 | 538659,1 | 526814,8 |
| 1005 | 15,5  | 14,44 | 15,25 | 4,142222 | 4,495462 | 4,225271 | 523552,2 | 542015,9 | 527849,4 |
| 1015 | 15,19 | 14,31 | 15,25 | 4,245235 | 4,538899 | 4,225271 | 528885,9 | 544324,6 | 527849,4 |
| 1025 | 15,13 | 14,13 | 15,13 | 4,26521  | 4,59904  | 4,26521  | 529924,5 | 547537,7 | 529924,5 |

|      |       |       |       |          |          |          |          |          |          |
|------|-------|-------|-------|----------|----------|----------|----------|----------|----------|
| 1035 | 15,13 | 14,13 | 15,06 | 4,26521  | 4,59904  | 4,288527 | 529924,5 | 547537,7 | 531138,8 |
| 1045 | 15,25 | 14,06 | 15    | 4,225271 | 4,622423 | 4,308522 | 527849,4 | 548792,3 | 532181,8 |
| 1055 | 15,31 | 14,06 | 14,88 | 4,205319 | 4,622423 | 4,348539 | 526814,8 | 548792,3 | 534274   |
| 1065 | 15,31 | 13,94 | 14,69 | 4,205319 | 4,662496 | 4,411954 | 526814,8 | 550949,8 | 537603,4 |
| 1076 | 15,25 | 13,88 | 14,5  | 4,225271 | 4,682526 | 4,475415 | 527849,4 | 552031,7 | 540953,6 |
| 1086 | 15,19 | 13,75 | 14,38 | 4,245235 | 4,725901 | 4,51551  | 528885,9 | 554383,1 | 543080,2 |
| 1096 | 15,06 | 13,63 | 14,31 | 4,288527 | 4,765908 | 4,538899 | 531138,8 | 556562,6 | 544324,6 |
| 1106 | 15    | 13,5  | 14,19 | 4,308522 | 4,809206 | 4,578995 | 532181,8 | 558933,3 | 546464,6 |
| 1116 | 14,88 | 13,38 | 14    | 4,348539 | 4,849127 | 4,642462 | 534274   | 561130,7 | 549870   |
| 1126 | 14,69 | 13,19 | 13,88 | 4,411954 | 4,912228 | 4,682526 | 537603,4 | 564627,5 | 552031,7 |
| 1136 | 14,5  | 13    | 13,63 | 4,475415 | 4,975175 | 4,765908 | 540953,6 | 568146,1 | 556562,6 |
| 1146 | 14,31 | 12,88 | 13,44 | 4,538899 | 5,014839 | 4,829172 | 544324,6 | 570379,6 | 560030,9 |
| 1156 | 14,19 | 12,63 | 13,25 | 4,578995 | 5,097209 | 4,892317 | 546464,6 | 575061,1 | 563520,9 |
| 1166 | 14    | 12,5  | 13,19 | 4,642462 | 5,139884 | 4,912228 | 549870   | 577510,7 | 564627,5 |
| 1176 | 13,88 | 12,38 | 13,06 | 4,682526 | 5,179172 | 4,955315 | 552031,7 | 579781   | 567032,6 |
| 1186 | 13,81 | 12,25 | 12,94 | 4,705885 | 5,221612 | 4,995016 | 553296,6 | 582250,7 | 569261,7 |
| 1196 | 13,69 | 12,25 | 13    | 4,745908 | 5,221612 | 4,975175 | 555471,8 | 582250,7 | 568146,1 |
| 1206 | 13,5  | 12,19 | 13,13 | 4,809206 | 5,241154 | 4,932124 | 558933,3 | 583394,1 | 565736,2 |

|      |       |       |       |          |          |          |          |          |          |
|------|-------|-------|-------|----------|----------|----------|----------|----------|----------|
| 1216 | 13,25 | 12,13 | 13,19 | 4,892317 | 5,260667 | 4,912228 | 563520,9 | 584539,7 | 564627,5 |
| 1226 | 13,13 | 12,19 | 13,25 | 4,932124 | 5,241154 | 4,892317 | 565736,2 | 583394,1 | 563520,9 |
| 1236 | 13,31 | 12,31 | 13,38 | 4,872391 | 5,202041 | 4,849127 | 562416,4 | 581109,5 | 561130,7 |
| 1247 | 13,69 | 12,63 | 13,63 | 4,745908 | 5,097209 | 4,765908 | 555471,8 | 575061,1 | 556562,6 |
| 1257 | 14,13 | 13,13 | 13,94 | 4,59904  | 4,932124 | 4,662496 | 547537,7 | 565736,2 | 550949,8 |
| 1267 | 14,5  | 13,63 | 14,31 | 4,475415 | 4,765908 | 4,538899 | 540953,6 | 556562,6 | 544324,6 |
| 1277 | 14,81 | 14,06 | 14,63 | 4,371895 | 4,622423 | 4,43199  | 535498,2 | 548792,3 | 538659,1 |
| 1287 | 15,13 | 14,38 | 14,94 | 4,26521  | 4,51551  | 4,328527 | 529924,5 | 543080,2 | 533226,8 |
| 1297 | 15,44 | 14,88 | 15,31 | 4,162133 | 4,348539 | 4,205319 | 524580,3 | 534274   | 526814,8 |
| 1307 | 15,81 | 15,31 | 15,69 | 4,039598 | 4,205319 | 4,079271 | 518272,3 | 526814,8 | 520309,8 |
| 1317 | 16,25 | 15,88 | 16,19 | 3,894795 | 4,016489 | 3,914473 | 510869,5 | 517087,5 | 511872,7 |
| 1327 | 16,69 | 16,44 | 16,62 | 3,751234 | 3,832635 | 3,77398  | 503572,5 | 507705,7 | 504726,4 |
| 1337 | 17,06 | 16,94 | 17    | 3,631658 | 3,670315 | 3,650971 | 497517,1 | 499473   | 498494,1 |
| 1347 | 17,44 | 17,31 | 17,37 | 3,510097 | 3,551532 | 3,532388 | 491373,8 | 493466,9 | 492499,7 |
| 1357 | 17,75 | 17,69 | 17,69 | 3,411965 | 3,430882 | 3,430882 | 486418,4 | 487373,6 | 487373,6 |
| 1367 | 18    | 18,06 | 18    | 3,333561 | 3,314846 | 3,333561 | 482458,5 | 481513   | 482458,5 |
| 1377 | 18,31 | 18,37 | 18,31 | 3,237309 | 3,218809 | 3,237309 | 477593,1 | 476657   | 477593,1 |
| 1387 | 18,62 | 18,69 | 18,62 | 3,142195 | 3,120882 | 3,142195 | 472776,6 | 471695,8 | 472776,6 |



|      |       |       |       |          |          |          |          |          |          |
|------|-------|-------|-------|----------|----------|----------|----------|----------|----------|
| 1397 | 18,87 | 19,06 | 18,94 | 3,066363 | 3,009274 | 3,045275 | 468927,8 | 466023,7 | 467855,8 |
| 1407 | 19,19 | 19,37 | 19,25 | 2,97049  | 2,917172 | 2,952668 | 464047   | 461323,9 | 463137,6 |
| 1418 | 19,44 | 19,75 | 19,62 | 2,896559 | 2,806109 | 2,843871 | 460269,3 | 455627,6 | 457568,4 |
| 1428 | 20,12 | 20,5  | 20,25 | 2,699997 | 2,593184 | 2,663205 | 450148,7 | 444590,3 | 448239,4 |
| 1438 | 21,06 | 21,5  | 21    | 2,439936 | 2,323129 | 2,456113 | 436523,9 | 430288,8 | 437381,1 |
| 1448 | 21,87 | 22,31 | 21,69 | 2,22743  | 2,116692 | 2,273695 | 425114,6 | 419042,4 | 427623,9 |
| 1458 | 22,37 | 23    | 22,12 | 2,101853 | 1,949882 | 2,164098 | 418221,2 | 409694,4 | 421653,8 |
| 1468 | 22,69 | 23,12 | 22,44 | 2,023782 | 1,921736 | 2,084621 | 413868,1 | 408090   | 417265   |
| 1478 | 23,12 | 23,62 | 22,94 | 1,921736 | 1,807246 | 1,964052 | 408090   | 401472,7 | 410498,9 |
| 1488 | 23,56 | 24,25 | 23,56 | 1,820747 | 1,669416 | 1,820747 | 402261,1 | 393287,4 | 402261,1 |
| 1498 | 24,12 | 25,12 | 24,19 | 1,697269 | 1,490896 | 1,682233 | 394962,6 | 382257,5 | 394059,7 |
| 1508 | 24,81 | 25,87 | 24,75 | 1,552937 | 1,347942 | 1,565145 | 386151,7 | 372997,6 | 386910   |
| 1518 | 25,44 | 26,31 | 25,37 | 1,42867  | 1,268736 | 1,442125 | 378278,8 | 367669,8 | 379145,6 |
| 1528 | 25,62 | 26,25 | 25,69 | 1,394475 | 1,279336 | 1,381334 | 376059   | 368391,8 | 375199,3 |
| 1538 | 25,87 | 26,25 | 26,06 | 1,347942 | 1,279336 | 1,31332  | 372997,6 | 368391,8 | 370687,6 |
| 1548 | 26,31 | 27,25 | 26,44 | 1,268736 | 1,110848 | 1,245987 | 367669,8 | 356541,4 | 366110,3 |
| 1558 | 26,75 | 27,69 | 26,87 | 1,192929 | 1,04213  | 1,172838 | 362418,2 | 351448,7 | 360999   |
| 1568 | 27,25 | 28,37 | 27,31 | 1,110848 | 0,942244 | 1,101285 | 356541,4 | 343720,9 | 355842,7 |

|      |       |       |       |          |          |          |          |          |          |
|------|-------|-------|-------|----------|----------|----------|----------|----------|----------|
| 1578 | 27,94 | 28,94 | 27,87 | 1,004525 | 0,864256 | 1,01495  | 348587,7 | 337374,3 | 349386,4 |
| 1588 | 28,44 | 29,31 | 28,44 | 0,932388 | 0,81635  | 0,932388 | 342935,1 | 333317,4 | 342935,1 |
| 1599 | 28,94 | 30    | 28,81 | 0,864256 | 0,732535 | 0,881591 | 337374,3 | 325881,7 | 338811,4 |
| 1609 | 29,06 | 30,06 | 29,12 | 0,848488 | 0,725578 | 0,840687 | 336053,2 | 325243   | 335394,5 |
| 1619 | 29,31 | 30,69 | 29,75 | 0,81635  | 0,655627 | 0,762087 | 333317,4 | 318611,9 | 328556,5 |
| 1629 | 29,87 | 31,5  | 30,37 | 0,747788 | 0,573685 | 0,690457 | 327269,9 | 310284,4 | 321963   |
| 1639 | 30,81 | 32,56 | 31,12 | 0,642931 | 0,479132 | 0,611038 | 317364,2 | 299714,7 | 314163,7 |
| 1649 | 31,69 | 33,63 | 31,94 | 0,55571  | 0,397017 | 0,532755 | 308362,8 | 289410,3 | 305852,5 |
| 1659 | 32,5  | 34,38 | 32,75 | 0,48412  | 0,346714 | 0,463612 | 300303,2 | 282399,5 | 297858,5 |
| 1669 | 33,25 | 35,19 | 33,13 | 0,424732 | 0,298493 | 0,433808 | 293028,6 | 275018,6 | 294180,6 |
| 1679 | 33,5  | 34,81 | 33,25 | 0,406325 | 0,32036  | 0,424732 | 290643,1 | 278456,9 | 293028,6 |
| 1689 | 32,94 | 34    | 32,56 | 0,448507 | 0,371491 | 0,479132 | 296013,8 | 285930,2 | 299714,7 |
| 1699 | 31,75 | 32,38 | 31,31 | 0,550129 | 0,494225 | 0,592125 | 307758,5 | 301483,8 | 312218   |
| 1709 | 30,94 | 31    | 30,31 | 0,629399 | 0,62323  | 0,697148 | 316018,1 | 315398,8 | 322595,3 |
| 1719 | 30,19 | 30,06 | 29,62 | 0,710683 | 0,725578 | 0,777818 | 323863,5 | 325243   | 329956   |
| 1729 | 29,75 | 29,56 | 29,25 | 0,762087 | 0,785163 | 0,823976 | 328556,5 | 330603,9 | 333972   |
| 1739 | 29,69 | 29,5  | 29,25 | 0,769316 | 0,792562 | 0,823976 | 329201,6 | 331253,1 | 333972   |
| 1749 | 29,81 | 29,75 | 29,69 | 0,754911 | 0,762087 | 0,769316 | 327912,5 | 328556,5 | 329201,6 |

|      |       |       |       |          |          |          |          |          |          |
|------|-------|-------|-------|----------|----------|----------|----------|----------|----------|
| 1759 | 30,25 | 31,06 | 30,62 | 0,70389  | 0,61711  | 0,663124 | 323228,8 | 314780,6 | 319342   |
| 1770 | 30,94 | 33,25 | 31,94 | 0,629399 | 0,424732 | 0,532755 | 316018,1 | 293028,6 | 305852,5 |
| 1780 | 32,31 | 35,56 | 33,5  | 0,500198 | 0,278426 | 0,406325 | 302174,6 | 271711,5 | 290643,1 |
| 1790 | 33,06 | 36,88 | 34,38 | 0,439177 | 0,215901 | 0,346714 | 294854,7 | 260234   | 282399,5 |
| 1800 | 33,5  | 37,38 | 34,88 | 0,406325 | 0,195587 | 0,316233 | 290643,1 | 256014,2 | 277820,3 |
| 1810 | 33,38 | 37,75 | 35,13 | 0,415076 | 0,181637 | 0,301859 | 291785,7 | 252935,6 | 275558,6 |
| 1820 | 33,56 | 36,88 | 35,31 | 0,402007 | 0,215901 | 0,291855 | 290073,5 | 260234   | 273941,6 |
| 1830 | 33,69 | 37,5  | 35,06 | 0,392782 | 0,190965 | 0,305827 | 288843,1 | 255011,6 | 276190   |
| 1840 | 33,31 | 36,19 | 34,25 | 0,420252 | 0,246891 | 0,35503  | 292454,3 | 266171,8 | 283602,5 |
| 1850 | 32,44 | 34,13 | 32,94 | 0,489151 | 0,362853 | 0,448507 | 300892,9 | 284717,4 | 296013,8 |
| 1860 | 31,62 | 32,44 | 31,62 | 0,562279 | 0,489151 | 0,562279 | 309069,4 | 300892,9 | 309069,4 |
| 1870 | 30,81 | 31,19 | 30,75 | 0,642931 | 0,604014 | 0,649254 | 317364,2 | 313445,5 | 317987,5 |
| 1880 | 30,12 | 30,19 | 30    | 0,718673 | 0,710683 | 0,732535 | 324605,6 | 323863,5 | 325881,7 |
| 1890 | 29,62 | 29,44 | 29,44 | 0,777818 | 0,800015 | 0,800015 | 329956   | 331903,6 | 331903,6 |
| 1900 | 29,19 | 28,94 | 29    | 0,831657 | 0,864256 | 0,856344 | 334627,8 | 337374,3 | 336713,1 |
| 1910 | 28,81 | 28,44 | 28,56 | 0,881591 | 0,932388 | 0,915675 | 338811,4 | 342935,1 | 341592,2 |
| 1920 | 28,37 | 27,94 | 28,19 | 0,942244 | 1,004525 | 0,967949 | 343720,9 | 348587,7 | 345749,8 |
| 1930 | 28    | 27,5  | 27,87 | 0,995654 | 1,071404 | 1,01495  | 347904,5 | 353638,9 | 349386,4 |

|      |       |       |       |          |          |          |          |          |          |
|------|-------|-------|-------|----------|----------|----------|----------|----------|----------|
| 1941 | 27,56 | 27,06 | 27,5  | 1,062094 | 1,141534 | 1,071404 | 352945,8 | 358763,3 | 353638,9 |
| 1951 | 27,06 | 26,62 | 27,12 | 1,141534 | 1,214976 | 1,131777 | 358763,3 | 363962   | 358060,2 |
| 1961 | 26,44 | 26,06 | 26,69 | 1,245987 | 1,31332  | 1,203068 | 366110,3 | 370687,6 | 363129,9 |
| 1971 | 25,81 | 25,5  | 26,25 | 1,359008 | 1,417207 | 1,279336 | 373730   | 377537,4 | 368391,8 |
| 1981 | 25,12 | 24,94 | 25,75 | 1,490896 | 1,526708 | 1,370139 | 382257,5 | 384513,9 | 374463,9 |
| 1991 | 24,69 | 24,44 | 25,31 | 1,577419 | 1,62926  | 1,453727 | 387669,8 | 390851,7 | 379890,1 |
| 2001 | 24,37 | 24,06 | 25    | 1,643978 | 1,710227 | 1,514706 | 391747,3 | 395738,2 | 383760,3 |
| 2011 | 24,25 | 23,75 | 24,62 | 1,669416 | 1,778216 | 1,59182  | 393287,4 | 399769,8 | 388558,1 |
| 2021 | 24,06 | 23,37 | 24,31 | 1,710227 | 1,863928 | 1,656664 | 395738,2 | 404767,8 | 392516,6 |
| 2031 | 23,81 | 23,06 | 23,94 | 1,764921 | 1,935777 | 1,736339 | 398986,3 | 408891,4 | 397294   |
| 2041 | 23,44 | 22,75 | 23,62 | 1,847944 | 2,009345 | 1,807246 | 403842,5 | 413057   | 401472,7 |
| 2051 | 22,87 | 22,37 | 23,31 | 1,980664 | 2,101853 | 1,8777   | 411439,5 | 418221,2 | 405562,7 |
| 2061 | 22,56 | 21,81 | 22,94 | 2,055281 | 2,24279  | 1,964052 | 415631,1 | 425949,4 | 410498,9 |
| 2071 | 22,56 | 21,56 | 22,44 | 2,055281 | 2,307452 | 2,084621 | 415631,1 | 429445,4 | 417265   |
| 2081 | 22,44 | 21,31 | 22,12 | 2,084621 | 2,373173 | 2,164098 | 417265   | 432970,2 | 421653,8 |
| 2091 | 22,19 | 20,94 | 21,81 | 2,14656  | 2,472349 | 2,24279  | 420689,8 | 438240   | 425949,4 |
| 2101 | 22,12 | 20,75 | 21,5  | 2,164098 | 2,524147 | 2,323129 | 421653,8 | 440971   | 430288,8 |
| 2112 | 22,06 | 20,56 | 21,37 | 2,179199 | 2,576525 | 2,357304 | 422481,8 | 443719   | 432121,6 |

|      |       |       |       |          |          |          |          |          |          |
|------|-------|-------|-------|----------|----------|----------|----------|----------|----------|
| 2122 | 22    | 20,5  | 21,25 | 2,194362 | 2,593184 | 2,389102 | 423311,4 | 444590,3 | 433820,4 |
| 2132 | 21,87 | 20,5  | 21,19 | 2,22743  | 2,593184 | 2,40509  | 425114,6 | 444590,3 | 434672,3 |
| 2142 | 21,75 | 20,31 | 21,06 | 2,258211 | 2,646311 | 2,439936 | 426785,8 | 447360,9 | 436523,9 |
| 2152 | 21,56 | 20,12 | 20,87 | 2,307452 | 2,699997 | 2,491364 | 429445,4 | 450148,7 | 439244,2 |
| 2162 | 21,37 | 20    | 20,69 | 2,357304 | 2,734188 | 2,540625 | 432121,6 | 451918,4 | 441836,9 |
| 2172 | 21,19 | 19,75 | 20,5  | 2,40509  | 2,806109 | 2,593184 | 434672,3 | 455627,6 | 444590,3 |
| 2182 | 20,94 | 19,5  | 20,25 | 2,472349 | 2,878945 | 2,663205 | 438240   | 459367,2 | 448239,4 |
| 2192 | 20,69 | 19,31 | 20    | 2,540625 | 2,934895 | 2,734188 | 441836,9 | 462229,9 | 451918,4 |
| 2202 | 20,44 | 19    | 19,69 | 2,6099   | 3,02725  | 2,823508 | 445463,4 | 466938,8 | 456522,3 |
| 2212 | 20,19 | 18,69 | 19,44 | 2,680154 | 3,120882 | 2,896559 | 449119,6 | 471695,8 | 460269,3 |
| 2222 | 20    | 18,5  | 19,25 | 2,734188 | 3,178874 | 2,952668 | 451918,4 | 474635,3 | 463137,6 |
| 2232 | 19,81 | 18,37 | 19,12 | 2,788764 | 3,218809 | 2,991345 | 454734,6 | 476657   | 465110,3 |
| 2242 | 19,69 | 18,25 | 18,94 | 2,823508 | 3,255852 | 3,045275 | 456522,3 | 478530,9 | 467855,8 |
| 2252 | 19,56 | 18,12 | 18,81 | 2,861382 | 3,296171 | 3,08449  | 458466,9 | 480569,3 | 469848,7 |
| 2262 | 19,37 | 17,94 | 18,62 | 2,917172 | 3,352316 | 3,142195 | 461323,9 | 483406   | 472776,6 |
| 2272 | 19,25 | 17,81 | 18,5  | 2,952668 | 3,393087 | 3,178874 | 463137,6 | 485465,1 | 474635,3 |
| 2283 | 19,06 | 17,62 | 18,31 | 3,009274 | 3,452998 | 3,237309 | 466023,7 | 488490,4 | 477593,1 |
| 2293 | 18,94 | 17,5  | 18,19 | 3,045275 | 3,491028 | 3,274436 | 467855,8 | 490410,8 | 479470,6 |

|      |       |       |       |          |          |          |          |          |          |
|------|-------|-------|-------|----------|----------|----------|----------|----------|----------|
| 2303 | 18,75 | 17,37 | 18    | 3,102663 | 3,532388 | 3,333561 | 470771,3 | 492499,7 | 482458,5 |
| 2313 | 18,69 | 17,25 | 17,94 | 3,120882 | 3,57071  | 3,352316 | 471695,8 | 494435,9 | 483406   |
| 2323 | 18,56 | 17,12 | 17,81 | 3,160512 | 3,612376 | 3,393087 | 473705   | 496542   | 485465,1 |
| 2333 | 18,44 | 17,06 | 17,69 | 3,19728  | 3,631658 | 3,430882 | 475567,3 | 497517,1 | 487373,6 |
| 2343 | 18,25 | 16,81 | 17,5  | 3,255852 | 3,71233  | 3,491028 | 478530,9 | 501600,5 | 490410,8 |
| 2353 | 18,06 | 16,69 | 17,37 | 3,314846 | 3,751234 | 3,532388 | 481513   | 503572,5 | 492499,7 |
| 2363 | 17,94 | 16,5  | 17,25 | 3,352316 | 3,813057 | 3,57071  | 483406   | 506710,6 | 494435,9 |
| 2373 | 17,75 | 16,31 | 17,06 | 3,411965 | 3,87514  | 3,631658 | 486418,4 | 509868,3 | 497517,1 |
| 2383 | 17,69 | 16,25 | 17    | 3,430882 | 3,894795 | 3,650971 | 487373,6 | 510869,5 | 498494,1 |
| 2393 | 17,56 | 16,12 | 16,87 | 3,471995 | 3,93746  | 3,692921 | 489449,6 | 513045,6 | 500617,5 |
| 2403 | 17,5  | 16,06 | 16,75 | 3,491028 | 3,957186 | 3,731768 | 490410,8 | 514053,1 | 502585,6 |
| 2413 | 17,37 | 15,94 | 16,62 | 3,532388 | 3,996701 | 3,77398  | 492499,7 | 516074   | 504726,4 |
| 2423 | 17,13 | 15,88 | 16,56 | 3,609166 | 4,016489 | 3,793505 | 496379,7 | 517087,5 | 505717,5 |
| 2433 | 17,25 | 15,75 | 16,5  | 3,57071  | 4,059426 | 3,813057 | 494435,9 | 519290   | 506710,6 |
| 2443 | 17,19 | 15,75 | 16,44 | 3,589922 | 4,059426 | 3,832635 | 495406,8 | 519290   | 507705,7 |
| 2454 | 17,06 | 15,69 | 16,37 | 3,631658 | 4,079271 | 3,855508 | 497517,1 | 520309,8 | 508869   |
| 2464 | 17    | 15,63 | 16,31 | 3,650971 | 4,099133 | 3,87514  | 498494,1 | 521331,5 | 509868,3 |
| 2474 | 16,94 | 15,56 | 16,25 | 3,670315 | 4,122326 | 3,894795 | 499473   | 522526,1 | 510869,5 |

|      |       |       |       |          |          |          |          |          |          |
|------|-------|-------|-------|----------|----------|----------|----------|----------|----------|
| 2484 | 16,87 | 15,5  | 16,19 | 3,692921 | 4,142222 | 3,914473 | 500617,5 | 523552,2 | 511872,7 |
| 2494 | 16,81 | 15,38 | 16,06 | 3,71233  | 4,182057 | 3,957186 | 501600,5 | 525610,5 | 514053,1 |
| 2504 | 16,69 | 15,31 | 15,94 | 3,751234 | 4,205319 | 3,996701 | 503572,5 | 526814,8 | 516074   |
| 2514 | 16,56 | 15,19 | 15,81 | 3,793505 | 4,245235 | 4,039598 | 505717,5 | 528885,9 | 518272,3 |

## APPENDIX II

### INPUT VALUES FOR CALCULATING PAVEMENT DEFLECTION CONSIDERING TEMPERATURE AND AXLE LOAD

| Resilient Strain in HMA | Axle Load | Pavement Temperature | Axle Load Constant | Temperature Constant | Deflection of Pavement  |
|-------------------------|-----------|----------------------|--------------------|----------------------|-------------------------|
| K1                      | N (kN)    | T (Degrees)          | K2                 | K3                   | $\Delta_{HMA}$ (inches) |
| 0,00000007              | 1000      | 23,87                | 0,4791             | 1,5606               | 0,00027                 |
| 0,00000007              | 1500      | 24,62                | 0,4791             | 1,5606               | 0,00035                 |
| 0,00000007              | 2000      | 25,06                | 0,4791             | 1,5606               | 0,00041                 |
| 0,00000007              | 2500      | 24,94                | 0,4791             | 1,5606               | 0,00045                 |
| 0,00000007              | 3000      | 25,12                | 0,4791             | 1,5606               | 0,00050                 |
| 0,00000007              | 3500      | 25,37                | 0,4791             | 1,5606               | 0,00054                 |
| 0,00000007              | 4000      | 25,75                | 0,4791             | 1,5606               | 0,00059                 |
| 0,00000007              | 4500      | 26,06                | 0,4791             | 1,5606               | 0,00064                 |
| 0,00000007              | 5000      | 26,12                | 0,4791             | 1,5606               | 0,00067                 |
| 0,00000007              | 5500      | 26,19                | 0,4791             | 1,5606               | 0,00071                 |
| 0,00000007              | 6000      | 26,37                | 0,4791             | 1,5606               | 0,00075                 |
| 0,00000007              | 1000      | 23,87                | 0,4791             | 1,5606               | 0,00027                 |
| 0,00000007              | 1500      | 24,62                | 0,4791             | 1,5606               | 0,00035                 |



|            |      |       |        |        |         |
|------------|------|-------|--------|--------|---------|
| 0,00000007 | 2000 | 25,06 | 0,4791 | 1,5606 | 0,00041 |
| 0,00000007 | 2500 | 24,94 | 0,4791 | 1,5606 | 0,00045 |
| 0,00000007 | 3000 | 25,12 | 0,4791 | 1,5606 | 0,00050 |
| 0,00000007 | 3500 | 25,37 | 0,4791 | 1,5606 | 0,00054 |
| 0,00000007 | 4000 | 25,75 | 0,4791 | 1,5606 | 0,00059 |
| 0,00000007 | 4500 | 26,06 | 0,4791 | 1,5606 | 0,00064 |
| 0,00000007 | 5000 | 26,12 | 0,4791 | 1,5606 | 0,00067 |
| 0,00000007 | 5500 | 26,19 | 0,4791 | 1,5606 | 0,00071 |
| 0,00000007 | 6000 | 26,37 | 0,4791 | 1,5606 | 0,00075 |
| 0,00000007 | 1000 | 23,87 | 0,4791 | 1,5606 | 0,00027 |
| 0,00000007 | 1500 | 24,62 | 0,4791 | 1,5606 | 0,00035 |
| 0,00000007 | 2000 | 25,06 | 0,4791 | 1,5606 | 0,00041 |
| 0,00000007 | 2500 | 24,94 | 0,4791 | 1,5606 | 0,00045 |
| 0,00000007 | 3000 | 25,12 | 0,4791 | 1,5606 | 0,00050 |
| 0,00000007 | 3500 | 25,37 | 0,4791 | 1,5606 | 0,00054 |
| 0,00000007 | 4000 | 25,75 | 0,4791 | 1,5606 | 0,00059 |
| 0,00000007 | 4500 | 26,06 | 0,4791 | 1,5606 | 0,00064 |

|            |       |       |        |        |         |
|------------|-------|-------|--------|--------|---------|
| 0,00000007 | 5000  | 26,12 | 0,4791 | 1,5606 | 0,00067 |
| 0,00000007 | 5500  | 26,19 | 0,4791 | 1,5606 | 0,00071 |
| 0,00000007 | 6000  | 26,37 | 0,4791 | 1,5606 | 0,00075 |
| 0,00000007 | 6500  | 26,69 | 0,4791 | 1,5606 | 0,00079 |
| 0,00000007 | 7000  | 26,94 | 0,4791 | 1,5606 | 0,00083 |
| 0,00000007 | 7500  | 27,12 | 0,4791 | 1,5606 | 0,00087 |
| 0,00000007 | 8000  | 27,12 | 0,4791 | 1,5606 | 0,00090 |
| 0,00000007 | 8500  | 27,12 | 0,4791 | 1,5606 | 0,00092 |
| 0,00000007 | 9000  | 27,06 | 0,4791 | 1,5606 | 0,00094 |
| 0,00000007 | 10000 | 27,25 | 0,4791 | 1,5606 | 0,00100 |
| 0,00000007 | 10500 | 27,50 | 0,4791 | 1,5606 | 0,00104 |
| 0,00000007 | 11000 | 27,75 | 0,4791 | 1,5606 | 0,00108 |
| 0,00000007 | 11500 | 28,19 | 0,4791 | 1,5606 | 0,00113 |
| 0,00000007 | 12000 | 28,62 | 0,4791 | 1,5606 | 0,00118 |
| 0,00000007 | 12500 | 28,56 | 0,4791 | 1,5606 | 0,00120 |
| 0,00000007 | 13000 | 28,81 | 0,4791 | 1,5606 | 0,00124 |

### APPENDIX III: INPUT VALUES FOR FIELD CALIBRATION CONSTANT KZ

| Kz           | C1           | C2           | K1r          | K2r    | K3r    |
|--------------|--------------|--------------|--------------|--------|--------|
| 1            | -<br>57,5815 | -<br>12,1605 | -<br>3,35412 | 0,4791 | 1,5606 |
| -1,28444E-09 | -<br>57,5815 | -<br>12,1605 | -<br>3,35412 | 0,4791 | 1,5606 |
| -1,28444E-09 | -<br>57,5815 | -<br>12,1605 | -<br>3,35412 | 0,4791 | 1,5606 |
| -1,28444E-09 | -<br>57,5815 | -<br>12,1605 | -<br>3,35412 | 0,4791 | 1,5606 |
| -1,28444E-09 | -<br>57,5815 | -<br>12,1605 | -<br>3,35412 | 0,4791 | 1,5606 |
| -1,28444E-09 | -<br>57,5815 | -<br>12,1605 | -<br>3,35412 | 0,4791 | 1,5606 |
| -1,28444E-09 | -<br>57,5815 | -<br>12,1605 | -<br>3,35412 | 0,4791 | 1,5606 |
| -1,28444E-09 | -<br>57,5815 | -<br>12,1605 | -<br>3,35412 | 0,4791 | 1,5606 |
| -1,28444E-09 | -<br>57,5815 | -<br>12,1605 | -<br>3,35412 | 0,4791 | 1,5606 |
| -1,28444E-09 | -<br>57,5815 | -<br>12,1605 | -<br>3,35412 | 0,4791 | 1,5606 |
| -1,28444E-09 | -<br>57,5815 | -<br>12,1605 | -<br>3,35412 | 0,4791 | 1,5606 |
|              |              |              |              |        |        |

## APPENDIX IV: PROCEDURE FOR INSTRUMENTATION AND INSTALLATION

### Road IOT Instrumentation Notes

#### 1. Installation

- Pull the two wires (power and antenna) through the PVC pipe.
- Before connecting the **20mm** male and female PVC pipes, apply the provided PVC Weld thoroughly. Connect the male and female.
- Place the device and pipes in the ground.
- Connect the power cable to the solar panel.
- Take down the current GPS location of the device as well as the device ID for the software developer to implement. This will ensure that the location of each device is known should the GPS fail.

#### 2. SigFox Backend

The device transmits the reading to the SigFox backend. This information can be seen at:

<https://backend.sigfox.com/>

**Username:** [bskrtell@gmail.com](mailto:bskrtell@gmail.com)

**Password:** banksZA111/

#### 3. Data package

The data will be sent to the backend as follow:

| Bytes            | Example                  | Description                           |
|------------------|--------------------------|---------------------------------------|
| RAW DATA         | 0f5444330f9313750c2810d6 |                                       |
| BYTE 0,1,2 and 3 | 0F 54 44 33              | <b>*Latitude</b>                      |
| BYTE 4,5,6 and 7 | 0F 93 13 75              | <b>*Longitude</b>                     |
| BYTE 8           | 0C                       | <b>Temperature ( degree Celsius)</b>  |
| BYTE 9           | 28                       | <b>Humidity ( % )</b>                 |
| BYTE 10 and 11   | 10 D6                    | <b>Battery Voltage ( Milli-Volts)</b> |

\* Latitude data should be divided by 10 000 000 to get the correct floating number

\* Longitude data should be divided by 10 000 000 to get the correct floating number

## C++ RUNTIME SIMULATION PROGRAM

```
//*****
//This is a program to calculate
//the deflection of subgrade due to the load
//acting on a pavement at varying subgrade water content
//*****
//
//NAME: Abejide, Olugbenga Samuel
//REGN:
//*****

#include <iostream>
#include <cmath>
using namespace std;

int main()
{
    float E1, W, G, Y, E2, H, Mr, MR, P, DR1, DR2, R = 1.8;
    float a, b;
    float NF, T, c, d;

    // Input parameters of the resilient modulus of subgrade.
    //Value of water content.
    cout << "Enter the value of the water content, Wc: ";
    cin >> W;
    cout << '\n';

    //Value of ground water table.
    cout << "Enter the value of the ground water table, GWT: ";
    cin >> G;
    cout << '\n';

    //Input value of temperature
    cout << "Enter value of pavement temperature, Tc: ";
    cin >> T;
    cout << '\n';

    cout << "Enter the thickness of soil: ";
    cin >> H;
    cout << '\n';

    cout << "Enter the value of applied load: ";
    cin >> P;
    cout << '\n';

    //Value of stress in pavement in MPa.
    Y = 0.67; //MPa

    //Calculation procedure for the resilient modulus of subgrade

    cout << "*****THE FOLLOWING ARE RESULTS AS COMPUTED IN THE PROGRAM*****" <<
    endl;
```

```

cout << '\n';
cout << '\n';

//cout << "Resilient modulus of subgrade, Er = " << E1 << endl;
cout << '\n';

a = pow(G, 0.1192);
b = ((51.72 * (1 / (0.3586 * a))) / W);
E1 = 2555 * pow(b, 0.64);
cout << "Resilient modulus of subgrade, Er = " << E1 << endl;
cout << '\n';

//Resilient strain is the ration of stress to strain
//The calculation for resilient strain is thus.
E2 = Y / E1;
cout << "Resilient strain, Esg = " << E2 << endl;
cout << '\n';

//*****
//**Input parameters for local repetition to failure.

c = 2.16 * pow(10, -14) * pow(1.16, T);
d = pow((E2 * pow(10, -6)), 4.2);
NF = c / d;
cout << '\n';
cout << "Load repetition to failure, Nf = " << NF << endl;
cout << '\n';

// Mr(subgrade) = Er
Mr = E1;
MR = 0.2 * pow(H, 0.45) * Mr; //MR is for subbase; Mr is for subgrade

cout << "MR (strain of sub base) = " << MR << endl;
cout << '\n';

DR1 = (0.24 * P) / (MR * R); // Deflection of sub base
DR2= (0.24 * P) / (Mr * R); //Deflection of subgrade
cout << "Deflection of subgrade = " << DR2 << endl;
cout << '\n';
cout << "Deflection of sub base = " << DR1 << endl;
cout << '\n';

return 0;
}

```
